# Supplementary material for: Interleukin-7 Resensitizes Non-Small-Cell Lung Cancer to Cisplatin via Inhibition of ABCG2
Source: Hindawi journal article supplement (doi:10.1155/2019/7241418), 2019-12-14
Supplement: f1 [file 7241418.f1.pdf]

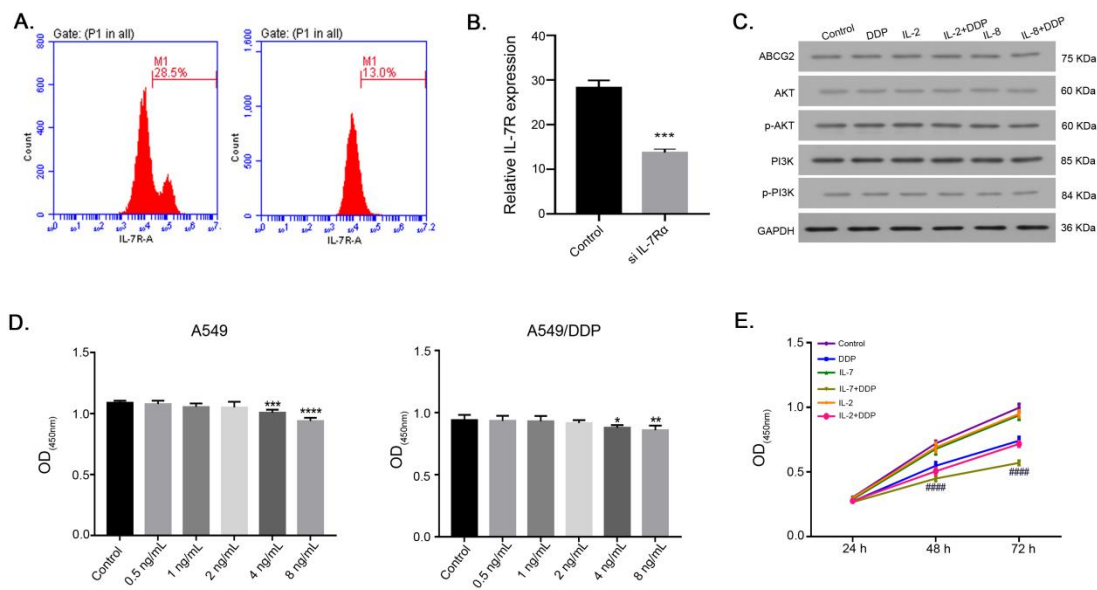

**Supplementary Figure.** Expression of IL-7R detected by flow cytometry (A and B) after transfected with IL-7R alpha siRNA and the corresponding negative control for 48 h. The A549/DDP cells were exposed to IL-2 (2 ng/mL) or IL-8 (2 ng/mL) with or without DDP (0.5  $\mu$ g/mL). At 48 h, the cells were harvested for examinations on the expressions of p-AKT and ABCG2 by Western blot along with PI3K and p-PI3K (C). The influences of different concentrations of IL-7 on the proliferation of A549 and A549/DDP cells were explored via CCK-8 assays (D). CCK-8 assay was performed to detect the effect of IL-7 and IL-2 on cell viability of DDP-treated A549/DDP cells (E). \* $p < 0.05$ , \*\* $p < 0.01$ , \*\*\* $p < 0.001$ , \*\*\*\* $p < 0.0001$ , as compared with the control group. #### $p < 0.0001$ , as compared with the DDP group. Data are presented in terms of mean  $\pm$  SD.
